# Supplementary material
Source: publisher figshare collection journal article supplement (https://acs.figshare.com/ndownloader/files/17509835)
Supplement: Supplementary file 1 [file 17509835]

**Supporting Information for**  
**Selective and Tunable Galectin Binding of Glycopolymers Synthesized by a Generalizable**  
**Conjugation Method**

Can Zhou,<sup>1</sup> Heidi L. Reesink<sup>2</sup> and David Putnam<sup>\*,1,3</sup>

<sup>1</sup> Meinig School of Biomedical Engineering, Cornell University, Ithaca NY 14853, USA

<sup>2</sup> Department of Clinical Sciences, Cornell University, Ithaca NY 14853, USA

<sup>3</sup> Robert Frederick Smith School of Chemical and Biomolecular Engineering, Cornell University,  
Ithaca NY 14853, USA

\*Author for correspondence; E-mail: dap43@cornell.edu

## **Contents of Supplemental Information**

|                                                                         |          |
|-------------------------------------------------------------------------|----------|
| Synthetic Scheme for Glycosylamines and PAA-g-Lactose-C8 Graft Polymers | Page S3  |
| <sup>1</sup> H NMR spectra and SEC for Table 1 Entries                  | Page S4  |
| <sup>1</sup> H NMR spectra for Lactosylamine                            | Page S5  |
| <sup>1</sup> H NMR spectra for Table 2 Entries                          | Page S6  |
| <sup>1</sup> H NMR spectra and SEC for Table 3 Entries                  | Page S7  |
| <sup>1</sup> H NMR spectra and SEC for PAA-g-Lactose-C8 Graft Polymers  | Page S8  |
| Molecular weights of polymers measured by SEC relative to pMAA          | Page S9  |
| SPR sensorgrams for interactions between glycopolymers and galectins    | Page S10 |

### Scheme S1. Synthesis of Glycosylamines

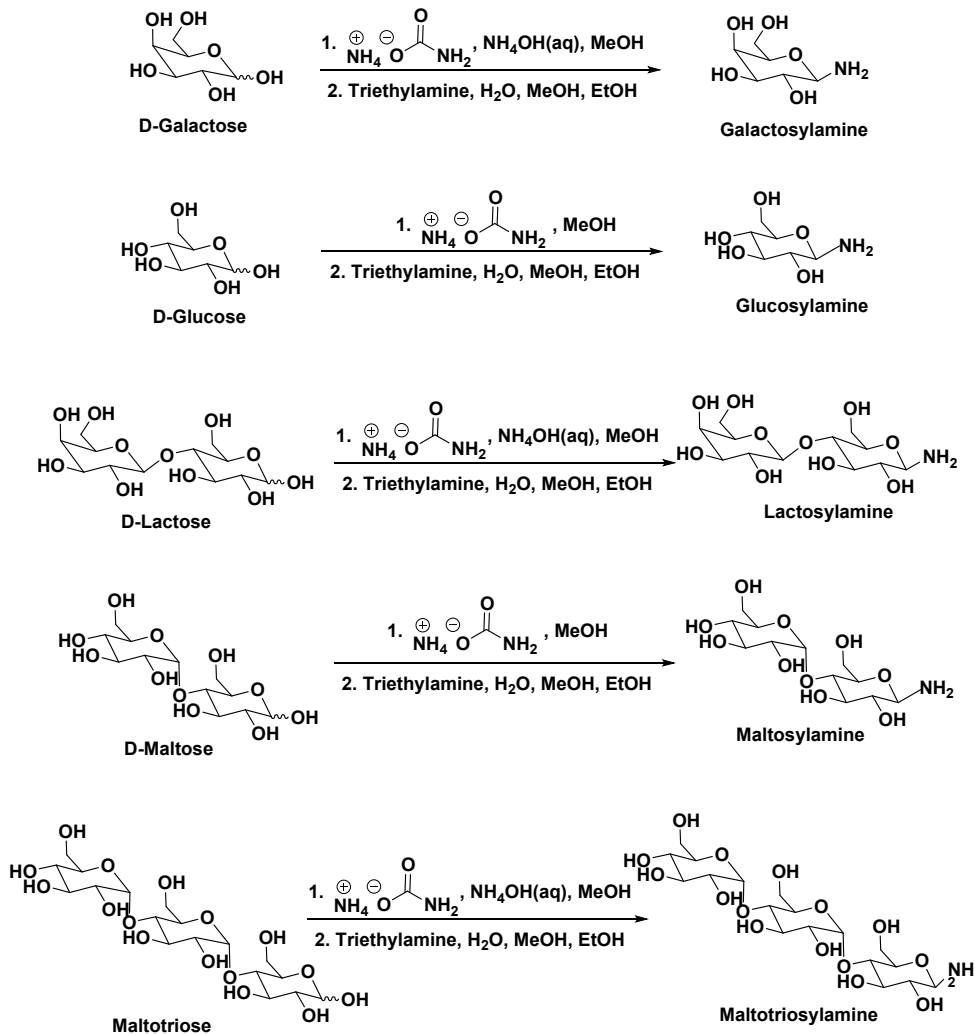

### Scheme S2. Synthesis of PAA-g-Lactose-C8 Graft Polymers

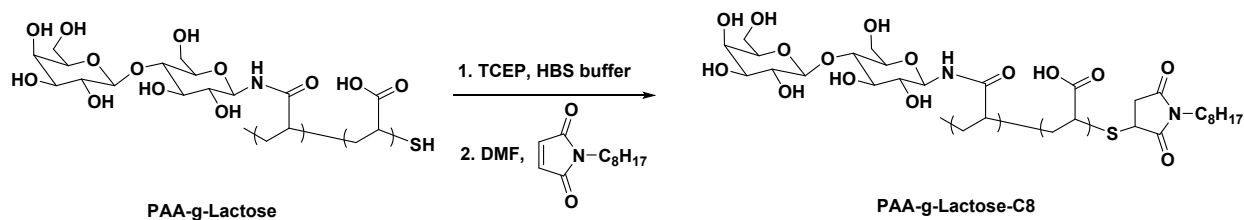

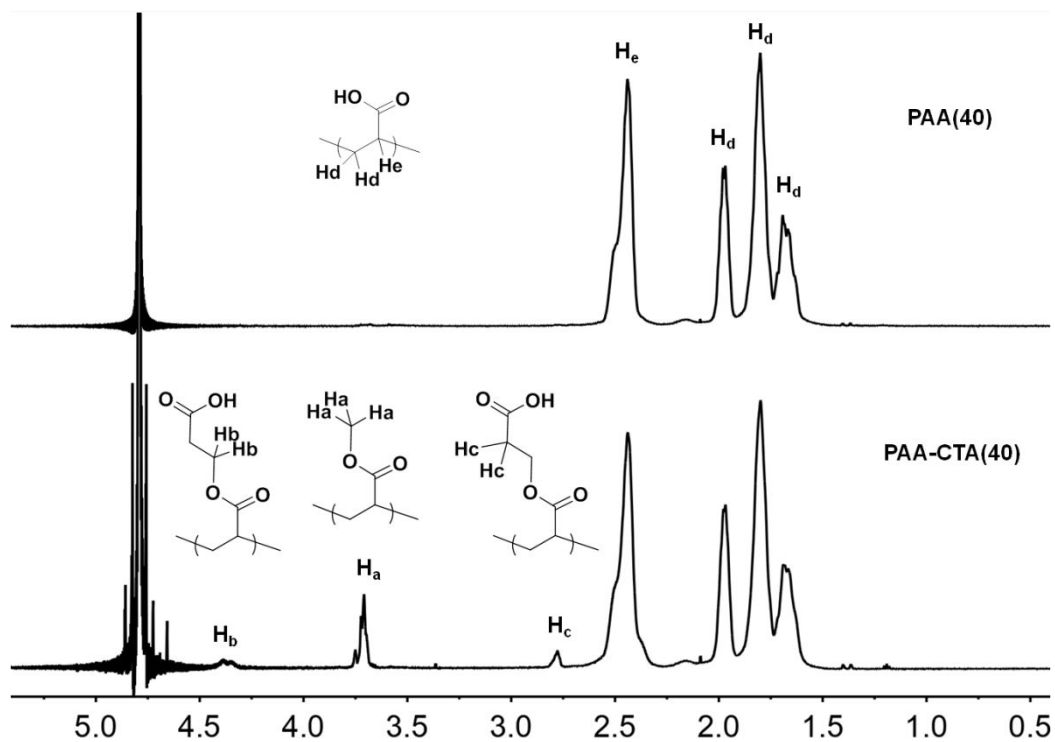

**Figure S1.**  $^1\text{H}$  NMR (600 MHz) spectra of PAA-CTA(40) (bottom) and PAA(40) (top) homopolymers in  $\text{D}_2\text{O}$ . Please note that OH are used to represent exchangeable hydrogens to maintain clarity, but the authors acknowledge that OD are equally representative of the structure.

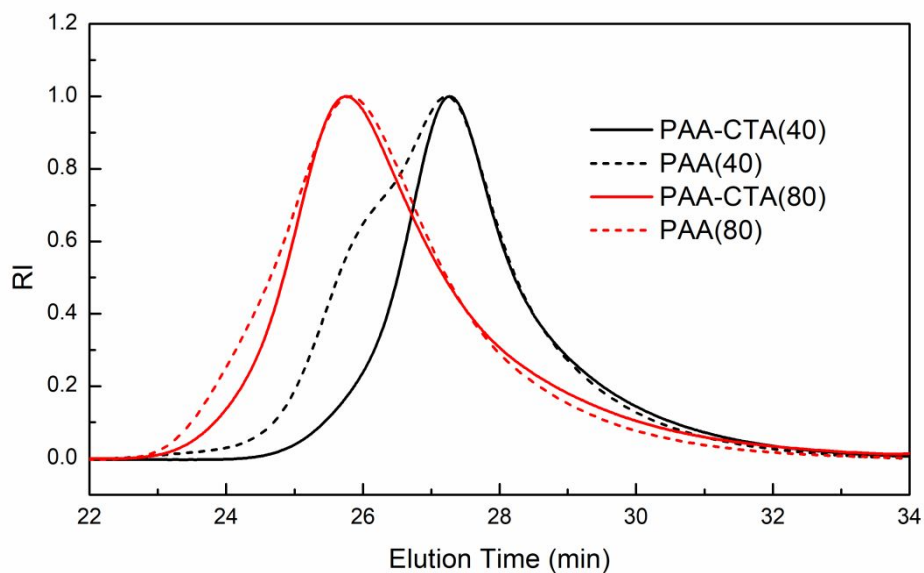

**Figure S2.** SEC trace of PAA-CTA(40), PAA(40), PAA-CTA(80), and PAA(80). PBS was used as the eluting solvent at a flow rate of 0.8 mL/min

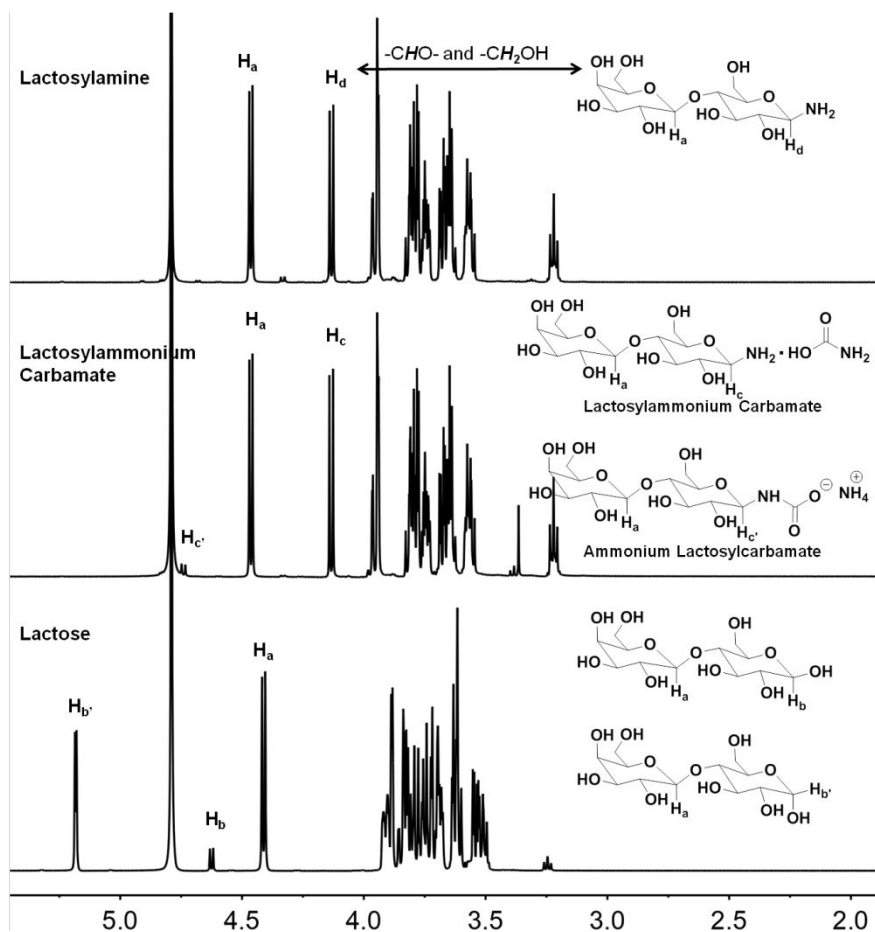

**Figure S3.**  $^1\text{H}$  NMR (600 MHz) spectra of lactose, lactosylammonium carbamate and lactosylamine in  $\text{D}_2\text{O}$ . Please note that OH and NH are used to represent exchangeable hydrogens to maintain clarity, but the authors acknowledge that OD and ND are equally representative of the structure.

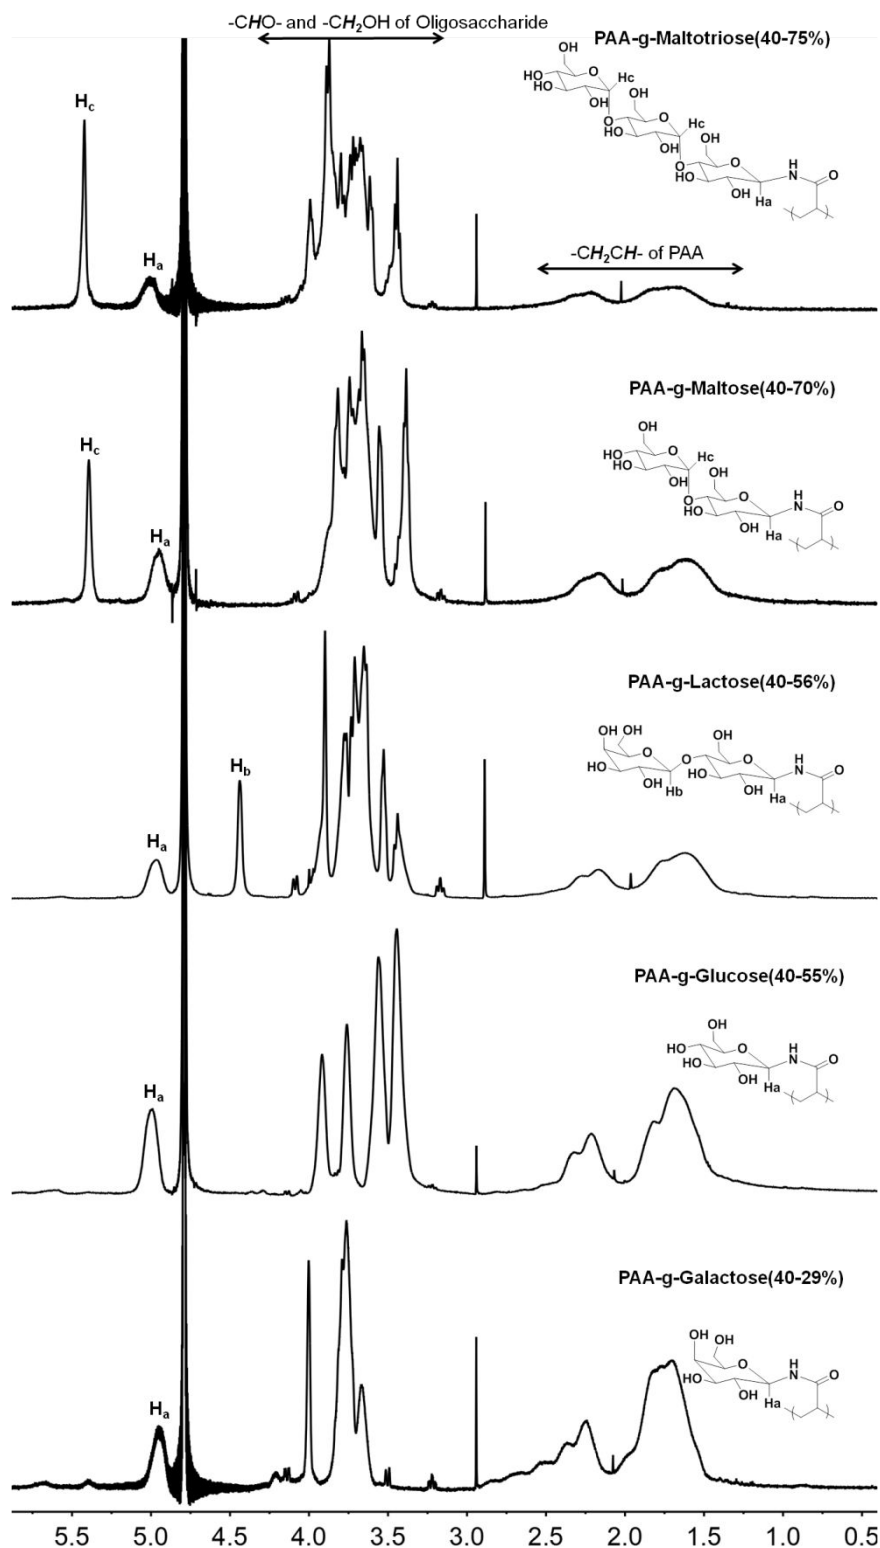

**Figure S4.**  $^1\text{H}$  NMR (600 MHz) spectra of PAA-g-Galactose(40-29%), PAA-g-Glucose(40-55%), PAA-g-Lactose(40-56%), PAA-g-Maltose(40-70%), and PAA-g-Maltotriose(40-75%) in  $\text{D}_2\text{O}$ . Please note that OH and NH are used to represent exchangeable hydrogens to maintain clarity, but the authors acknowledge that OD and ND are

equally representative of the structure.

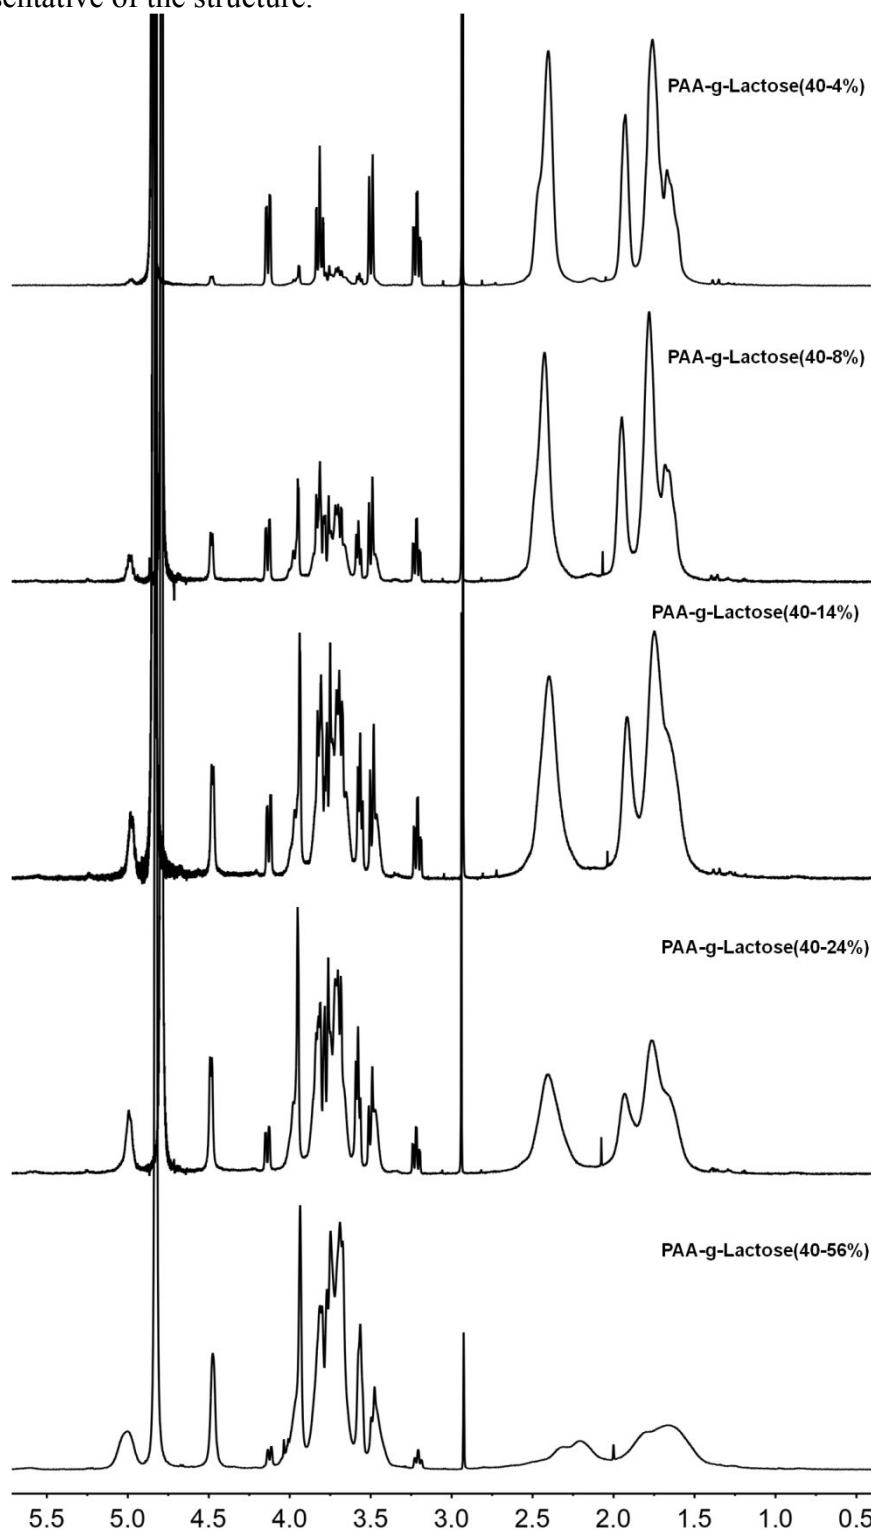

**Figure S5.**  $^1\text{H}$  NMR (600 MHz) spectra of PAA-g-Lactose(40-4%), PAA-g-Lactose(40-8%), PAA-g-Lactose(40-14%), PAA-g-Lactose(40-24%), and PAA-g-Lactose(40-56%) in  $\text{D}_2\text{O}$ . Please note that OH and NH are used to represent exchangeable hydrogens to maintain clarity,

but the authors acknowledge that OD and ND are equally representative of the structure.

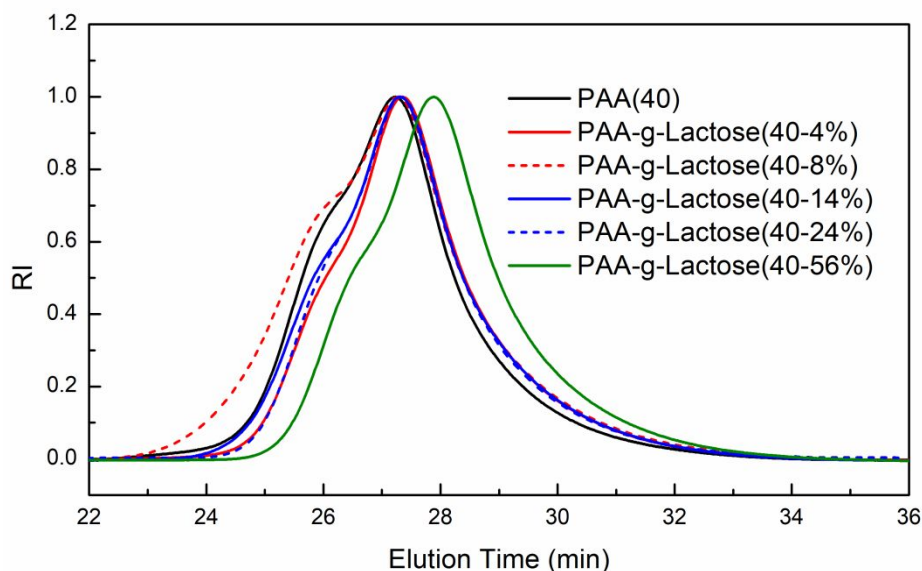

**Figure S6.** SEC trace of PAA (40), PAA-g-Lactose(40-4%), PAA-g-Lactose(40-8%), PAA-g-Lactose(40-14%), PAA-g-Lactose(40-24%), and PAA-g-Lactose(40-56%). PBS was used as the eluting solvent at a flow rate of 0.8 mL/min

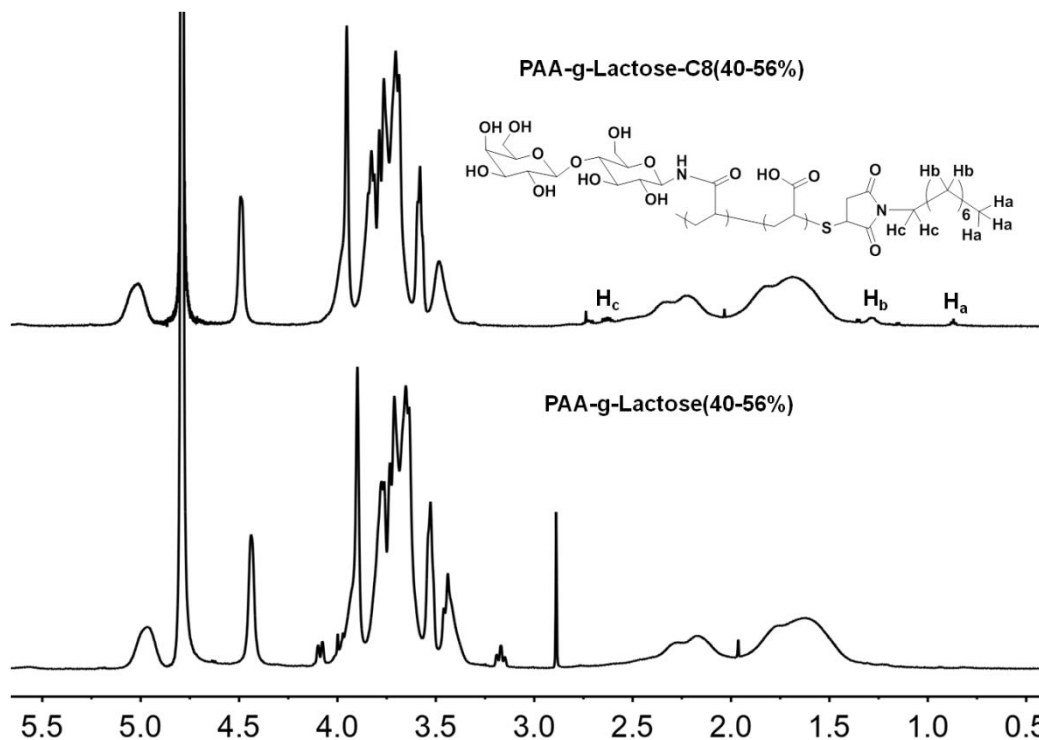

**Figure S7.** <sup>1</sup>H NMR (600 MHz) spectra of PAA-g-Lactose(40-56%) and PAA-g-Lactose-C8(40-56%) in D<sub>2</sub>O. Please note that OH and NH are used to represent exchangeable hydrogens to maintain clarity, but the authors acknowledge that OD and ND are



equally representative of the structure.

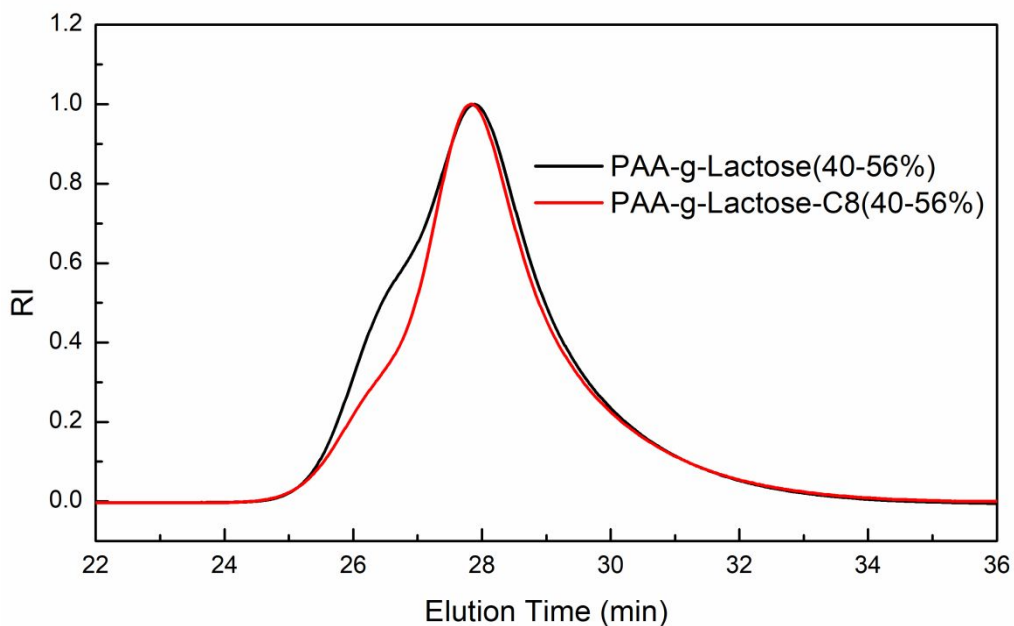

**Figure S8.** SEC trace of PAA-g-Lactose(40-56%) and PAA-g-Lactose-C8(40-56%). PBS was used as the eluting solvent at a flow rate of 0.8 mL/min

**Table S1:** Molecular weights of polymers measured by SEC relative to pMAA

| Samples                   | $M_n$ (kD) | $\bar{D}$ |
|---------------------------|------------|-----------|
| PAA-CTA(40)               | 64         | 1.19      |
| PAA(40)                   | 69         | 1.32      |
| PAA-CTA(80)               | 113        | 1.35      |
| PAA(80)                   | 117        | 1.48      |
| PAA-g-galactose(40-29%)   | 34         | 1.40      |
| PAA-g-glucose(40-55%)     | 35         | 1.34      |
| PAA-g-lactose(40-56%)     | 53         | 1.30      |
| PAA-g-maltose(40-70%)     | 55         | 1.32      |
| PAA-g-maltotriose(40-75%) | 59         | 1.32      |
| PAA-g-lactose(40-4%)      | 65         | 1.36      |
| PAA-g-lactose(40-8%)      | 75         | 1.46      |
| PAA-g-lactose(40-14%)     | 68         | 1.36      |
| PAA-g-lactose(40-24%)     | 67         | 1.29      |
| PAA-g-lactose(40-56%)     | 53         | 1.30      |
| PAA-g-lactose(80-55%)     | 87         | 1.56      |
| PAA-g-lactose-C8(40-56%)  | 52         | 1.27      |

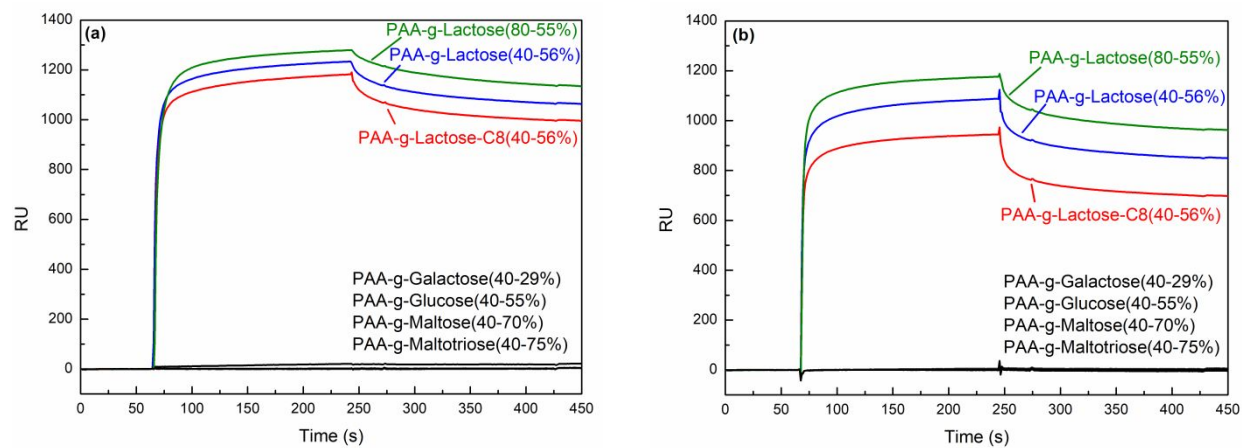

**Figure S9.** SPR sensorgrams for the binding interactions between glycopolymers and (a) galectin 3 and (b) galectin 1 obtained by flowing 0.1 mg/mL glycopolymers over galectin-modified sensor chip surface.

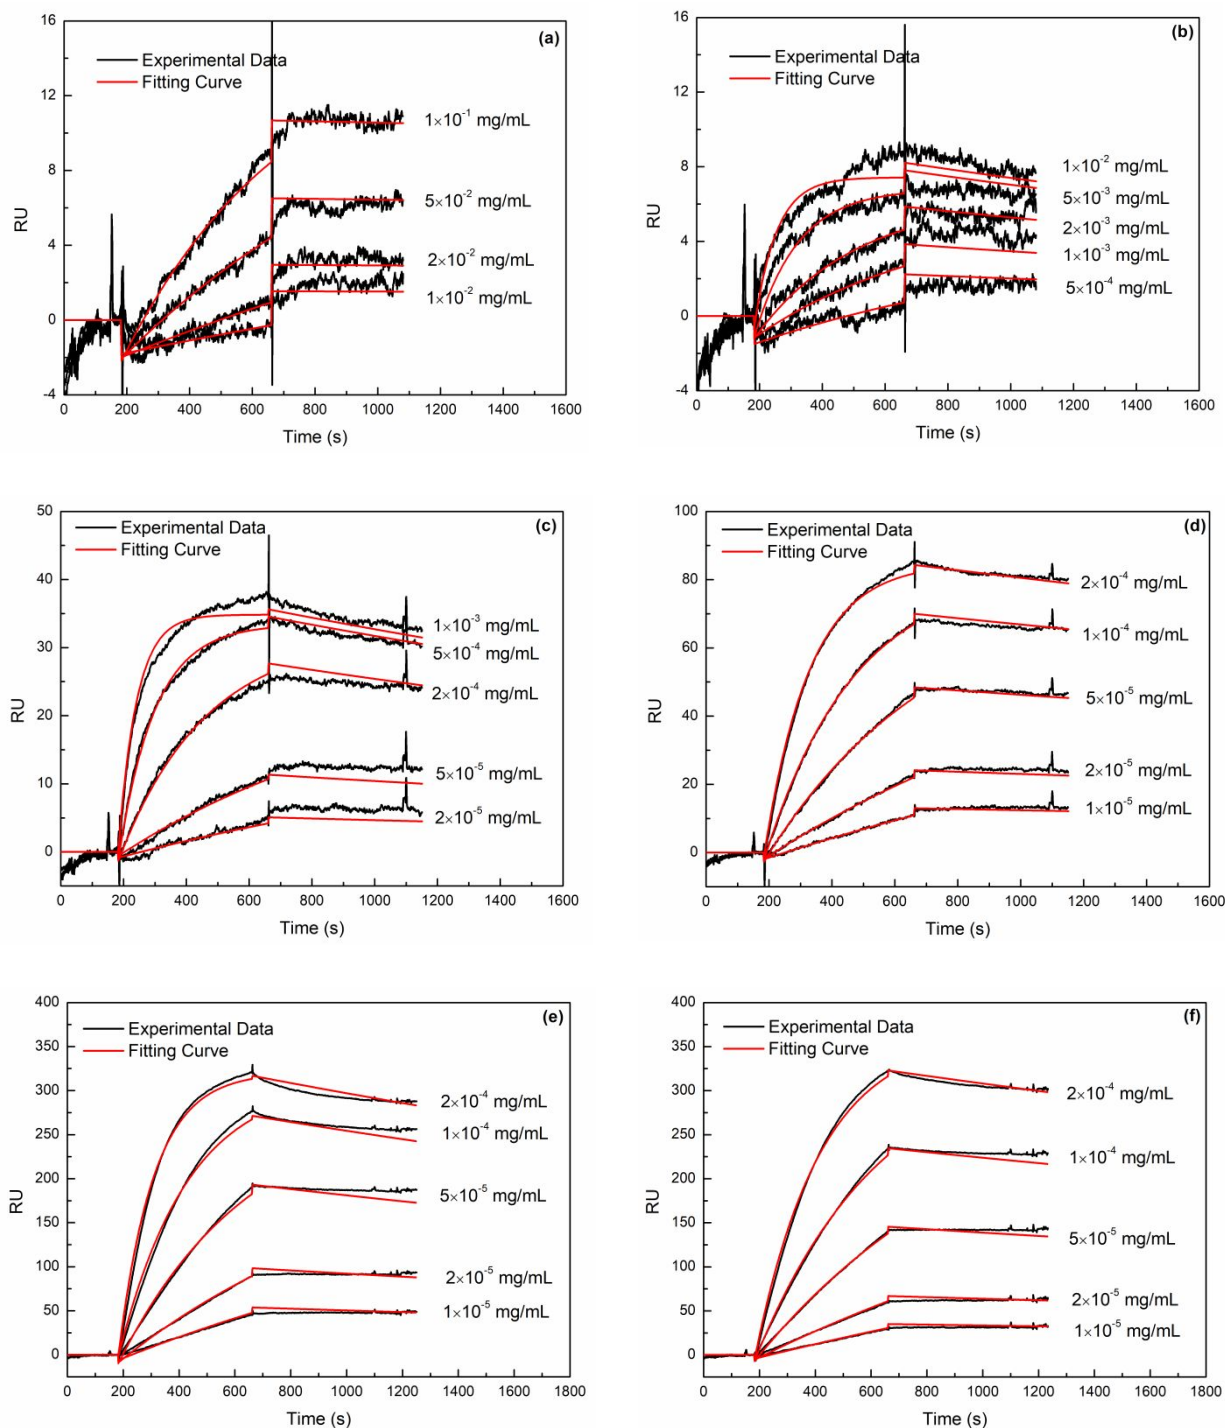

**Figure S10.** SPR sensorgrams and fitting curves for the binding interactions between galectin 3 and (a) PAA-g-Lactose(40-4%), (b) PAA-g-Lactose(40-8%), (c) PAA-g-Lactose(40-14%) (d) PAA-g-Lactose(40-24%) (e) PAA-g-Lactose(40-56%), and (f) PAA-g-Lactose(80-55%) obtained by flowing PAA-g-Lactose graft polymers at varying concentrations over galectin 3-modified sensor chip surface. The black curves represent experimental data, while the red curves represent model fits.

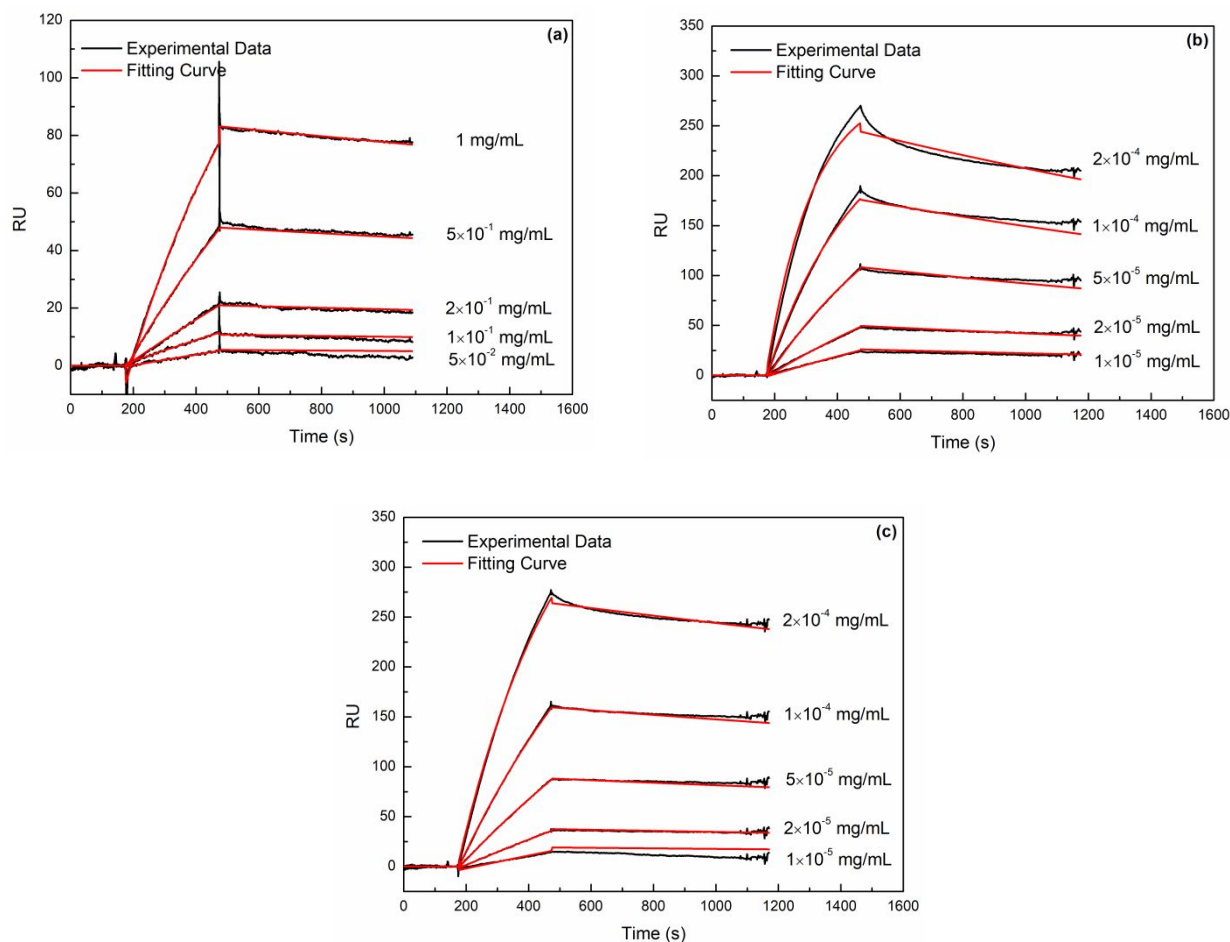

**Figure S11.** SPR sensorgrams and fitting curves for the binding interactions between galectin 1 and (a) PAA-g-Lactose(40-24%) (b) PAA-g-Lactose(40-56%), and (c) PAA-g-Lactose(80-55%) obtained by flowing PAA-g-Lactose graft polymers at varying concentrations over galectin 1-modified sensor chip surface. The black curves represent experimental data, while the red curves represent model fits.

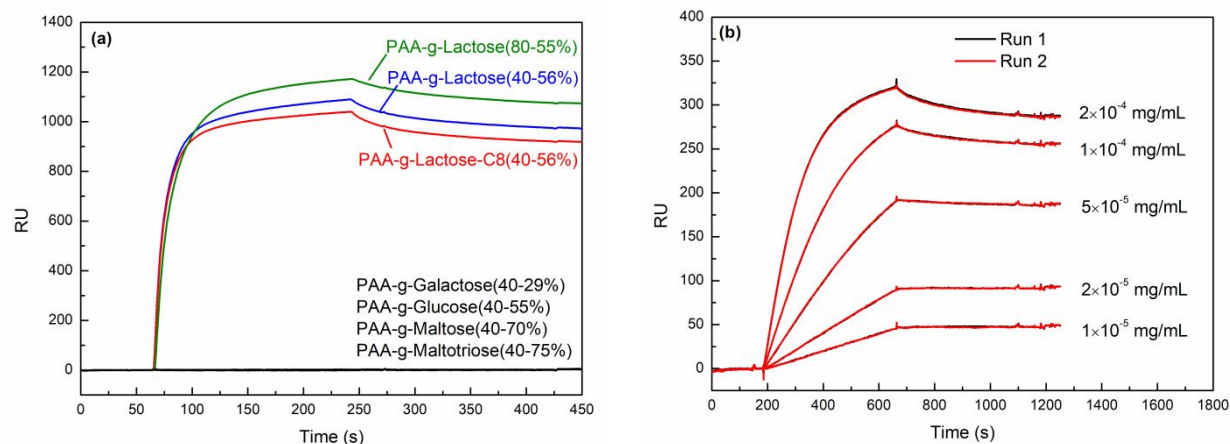

**Figure S12.** (a) SPR sensorgrams for the binding interactions between glycopolymers and galectin 3 obtained by flowing 0.01 mg/mL glycopolymers over galectin 3-modified sensor chip surface. (b) SPR sensorgrams for the binding interactions between PAA-g-Lactose(40-56%) and galectin 3 obtained by flowing PAA-g-Lactose(40-56%) over galectin 3-modified sensor chip surface. All runs were repeated twice to check the reproducibility of SPR experiments.
